# Supplementary material for: Global Prevalence of Periodontal Disease and Lack of Its Surveillance
Source: Hindawi journal article supplement (doi:10.1155/2020/2146160), 2020-05-28
Supplement: f1 [file 2146160.f1.pdf]

## Supplementary files

Table 1. Prevalence of periodontal disease among adolescents (15-19 years)

| <b>Countries</b>    | <b>Year of study</b> | <b>0 (No disease) (%)</b> | <b>1(Bleeding on probing) (%)</b> | <b>2 (Calculus) (%)</b> | <b>3 (PD 4-5mm) (%)</b> | <b>4 (PD 6+mm) (%)</b> |
|---------------------|----------------------|---------------------------|-----------------------------------|-------------------------|-------------------------|------------------------|
| <b>Croatia</b>      | 2000                 | 16                        | 20                                | 52                      | 12                      | 0                      |
| <b>Germany</b>      | 2005                 | 2                         | 51                                | 33                      | 13                      | 1                      |
| <b>Hungary</b>      | 2003                 | 36                        | 19                                | 35                      | 10                      | 0                      |
| <b>Japan</b>        | 2011                 | 31                        | 24                                | 41                      | 5                       | 0                      |
| <b>Norway</b>       | 2003                 | 1                         | 19                                | 13                      | 58                      | 8                      |
| <b>Saudi Arabia</b> | 2010                 | 14                        | 24                                | 61                      | 2                       | 0                      |
| <b>Slovakia</b>     | 2000                 | 23                        | 24                                | 51                      | 2                       | 0                      |
| <b>Spain</b>        | 2005                 | 35                        | 37                                | 29                      | 0                       | 0                      |
| <b>Taiwan</b>       | 2008                 | 3                         | 15                                | 68                      | 14                      | 0                      |
| <b>Comoros</b>      | 2001                 | 8                         | 1                                 | 90                      | 0                       | 0                      |
| <b>Mongolia</b>     | 2012                 | 30                        | 24                                | 46                      | 1                       | 0                      |
| <b>Benin</b>        | 2003                 | 46                        | 1                                 | 53                      | 0                       | 0                      |
| <b>Madagascar</b>   | 2002                 | 19                        | 6                                 | 66                      | 3                       | 0                      |
| <b>Nepal</b>        | 2004                 | 26                        | 8                                 | 61                      | 5                       | 0                      |
| <b>Belarus</b>      | 2000/2001            | 0                         | 7                                 | 79                      | 15                      | 0                      |
| <b>Brazil</b>       | 2005                 | 48                        | 40                                | 10                      | 3                       | 0                      |
| <b>Iran</b>         | 2004                 | 11                        | 12                                | 46                      | 30                      | 0                      |
| <b>Malaysia</b>     | 2007                 | 11                        | 13                                | 75                      | 1                       | 0                      |
| <b>Namibia</b>      | 2013                 | 39                        | 17                                | 44                      | 0                       | 0                      |
| <b>Romania</b>      | 2009                 | 26                        | 14                                | 53                      | 8                       | 0                      |
| <b>Total</b>        |                      | 21.25                     | 18.8                              | 50.3                    | 9.1                     | 0.45                   |

Table 2. Prevalence of periodontal disease among adults (35-44 years)

| <b>Countries</b>  | <b>Year of study</b> | <b>0 (No disease) (%)</b> | <b>1(Bleeding on probing) (%)</b> | <b>2 (Calculus) (%)</b> | <b>3 (PD 4-5mm) (%)</b> | <b>4 (PD 6+mm) (%)</b> |
|-------------------|----------------------|---------------------------|-----------------------------------|-------------------------|-------------------------|------------------------|
| <b>Argentina</b>  | 1999/2000            | 3                         | 14                                | 43                      | 26                      | 14                     |
| <b>Croatia</b>    | 2000                 | 6                         | 6                                 | 41                      | 32                      | 15                     |
| <b>Denmark</b>    | 2000/01              | 8                         | 16                                | 41                      | 29                      | 6                      |
| <b>Germany</b>    | 2005                 | 1                         | 12                                | 14                      | 52                      | 21                     |
| <b>Greece</b>     | 2005                 | 10                        | 16                                | 47                      | 24                      | 3                      |
| <b>Hungary</b>    | 2003                 | 11                        | 5                                 | 57                      | 22                      | 6                      |
| <b>Israel</b>     | 2008/2009            | 5                         | 10                                | 38                      | 33                      | 14                     |
| <b>Japan</b>      | 2016                 | 29                        | 11                                | 18                      | 37                      | 5                      |
| <b>Poland</b>     | 2011                 | 5                         | 15                                | 18                      | 45                      | 17                     |
| <b>Slovakia</b>   | 2000                 | 8                         | 5                                 | 44                      | 29                      | 15                     |
| <b>Spain</b>      | 2005                 | 15                        | 13                                | 47                      | 22                      | 4                      |
| <b>Taiwan</b>     | 2008                 | 1                         | 2                                 | 44                      | 37                      | 16                     |
| <b>Cambodia</b>   | 2011                 | 4                         | 4                                 | 80                      | 8                       | 2                      |
| <b>Comoros</b>    | 2000/01              | 2                         | 0                                 | 84                      | 0                       | 0                      |
| <b>Mongolia</b>   | 2012                 | 30                        | 7                                 | 59                      | 3                       | 1                      |
| <b>India</b>      | 2011                 | 0                         | 37                                | 37                      | 26                      | 0                      |
| <b>Benin</b>      | 2003                 | 37                        | 1                                 | 61                      | 1                       | 1                      |
| <b>Madagascar</b> | 2002                 | 8                         | 5                                 | 67                      | 17                      | 3                      |
| <b>Nepal</b>      | 2004                 | 7                         | 3                                 | 27                      | 48                      | 16                     |
| <b>Belarus</b>    | 2000/2001            | 0                         | 0                                 | 24                      | 63                      | 13                     |
| <b>Brazil</b>     | 2010                 | 26                        | 3                                 | 42                      | 23                      | 6                      |
| <b>China</b>      | 2012                 | 0                         | 0                                 | 57                      | 30                      | 13                     |
| <b>Iran</b>       | 2002                 | 1                         | 6                                 | 40                      | 43                      | 10                     |
| <b>Libya</b>      | 2012                 | 2                         | 4                                 | 38                      | 47                      | 9                      |
| <b>Malaysia</b>   | 2010                 | 2                         | 2                                 | 36                      | 35                      | 25                     |
| <b>Namibia</b>    | 2013                 | 20                        | 15                                | 54                      | 8                       | 3                      |
| <b>Turkey</b>     | 2010                 | 11                        | 30                                | 47                      | 9                       | 3                      |
| <b>Total</b>      |                      | 9.33                      | 8.96                              | 44.63                   | 27.7                    | 8.92                   |

Table 3. Prevalence of periodontal disease among older persons (65-74 years)

| <b>Countries</b>  | <b>Year of study</b> | <b>0 (No disease) (%)</b> | <b>1(Bleeding on probing) (%)</b> | <b>2 (Calculus) (%)</b> | <b>3 (PD 4-5mm) (%)</b> | <b>4 (PD 6+mm) (%)</b> |
|-------------------|----------------------|---------------------------|-----------------------------------|-------------------------|-------------------------|------------------------|
| <b>Croatia</b>    | 2000                 | 0                         | 0                                 | 17                      | 48                      | 35                     |
| <b>Denmark</b>    | 2000/01              | 2                         | 9                                 | 23                      | 46                      | 20                     |
| <b>Germany</b>    | 2005                 | 1                         | 4                                 | 7                       | 48                      | 40                     |
| <b>Hungary</b>    | 2003                 | 7                         | 10                                | 46                      | 26                      | 11                     |
| <b>Japan</b>      | 2016                 | 23                        | 6                                 | 10                      | 44                      | 17                     |
| <b>Slovakia</b>   | 2000                 | 63                        | 4                                 | 18                      | 11                      | 4                      |
| <b>Spain</b>      | 2005                 | 10                        | 13                                | 39                      | 27                      | 11                     |
| <b>Taiwan</b>     | 2008                 | 1                         | 1                                 | 26                      | 46                      | 27                     |
| <b>Cambodia</b>   | 2011                 | 2                         | 1                                 | 52                      | 24                      | 21                     |
| <b>India</b>      | 2011                 | 0                         | 0                                 | 37                      | 37                      | 26                     |
| <b>Mongolia</b>   | 2012                 | 24                        | 14                                | 43                      | 16                      | 4                      |
| <b>Madagascar</b> | 2002                 | 1                         | 0                                 | 17                      | 5                       | 2                      |
| <b>Nepal</b>      | 2004                 | 1                         | 1                                 | 18                      | 48                      | 25                     |
| <b>Brazil</b>     | 2010                 | 19                        | 2                                 | 44                      | 26                      | 9                      |
| <b>China</b>      | 2012                 | 0                         | 0                                 | 39                      | 33                      | 28                     |
| <b>Malaysia</b>   | 2010                 | 3                         | 2                                 | 32                      | 33                      | 30                     |
| <b>Namibia</b>    | 2013                 | 3                         | 4                                 | 51                      | 24                      | 14                     |
| <b>Turkey</b>     | 2005                 | 14                        | 20                                | 55                      | 9                       | 2                      |
| <b>Total</b>      |                      | 9.66                      | 5.05                              | 31.89                   | 30.61                   | 18.11                  |
